# Supplementary material for: Cystathionine β-synthase is involved in cysteine biosynthesis and H2S generation in Toxoplasma gondii
Source: PubMed Central journal article supplement (PMC7474069; doi:10.1038/s41598-020-71469-x), 2020-09-04
Supplement: 41598_2020_71469_MOESM1_ESM.pdf [file 41598_2020_71469_MOESM1_ESM.pdf]

## SUPPLEMENTARY INFORMATION

### Cystathionine $\beta$ -synthase is involved in cysteine biosynthesis and H<sub>2</sub>S generation in *Toxoplasma gondii*

Carolina Conter<sup>1†</sup>, Silvia Fruncillo<sup>1a†</sup>, Carmen Fernández-Rodríguez<sup>2</sup>, Luis Alfonso Martínez-Cruz<sup>2</sup>, Paola Dominici<sup>1</sup> and Alessandra Astegno<sup>1\*</sup>

<sup>1</sup>Department of Biotechnology, University of Verona, Strada Le Grazie 15, 37134 Verona, Italy.

<sup>2</sup>Center for Cooperative Research in Biosciences (CIC bioGUNE), Basque Research and Technology Alliance (BRTA), Bizkaia Technology Park, Building 801A, 48160 Derio, Spain

<sup>a</sup> Present address: Manchester Institute of Biotechnology, University of Manchester, 131 Princess Street, Manchester M1 7DN, United Kingdom.

<sup>†</sup>These authors contributed equally to the work.

\*Corresponding author: Alessandra Astegno, e-mail: [alessandra.astegno@univr.it](mailto:alessandra.astegno@univr.it)

**Table S1. Steady-state kinetic parameters of TgCBS for canonical reactions in the presence of SAM<sup>a</sup>.**

|                                                | - SAM       | + SAM<br>0.5 mM |
|------------------------------------------------|-------------|-----------------|
| <b>L-Ser + L-Hcys → L-Cth + H<sub>2</sub>O</b> |             |                 |
| $k_{\text{cat}}$ (s <sup>-1</sup> )            | 6.3 ± 0.4   | 5.9 ± 0.2       |
| $K_{\text{m}}^{\text{L-Ser}}$ (mM)             | 0.42 ± 0.04 | 0.47 ± 0.03     |
| $K_{\text{m}}^{\text{L-Hcys}}$ (mM)            | 0.23 ± 0.03 | 0.28 ± 0.04     |
| $K_{\text{i}}^{\text{L-Hcys}}$ (mM)            | 1.0 ± 0.1   | 1.1 ± 0.2       |
| <b>L-OAS + L-Hcys → L-Cth + H<sub>2</sub>O</b> |             |                 |
| $k_{\text{cat}}$ (s <sup>-1</sup> )            | 5.5 ± 0.1   | 5.7 ± 0.3       |
| $K_{\text{m}}^{\text{L-OAS}}$ (mM)             | 1.3 ± 0.2   | 1.6 ± 0.2       |
| $K_{\text{m}}^{\text{L-Hcys}}$ (mM)            | 0.20 ± 0.05 | 0.24 ± 0.04     |
| $K_{\text{i}}^{\text{L-Hcys}}$ (mM)            | 1.4 ± 0.2   | 1.7 ± 0.3       |

<sup>a</sup> Reactions were carried out in MBP buffer pH 9 containing 0.2 mM NADH, 2  $\mu$ M LDH, 1.5  $\mu$ M CBL, and 0.1-10 mM L-Ser (or 1-100 mM L-OAS), 0.1-10 mM L-Hcys and 0.2-2  $\mu$ M TgCBS at 37°C. Data were fit to Eq. (1). Data are mean ± s.e.m.

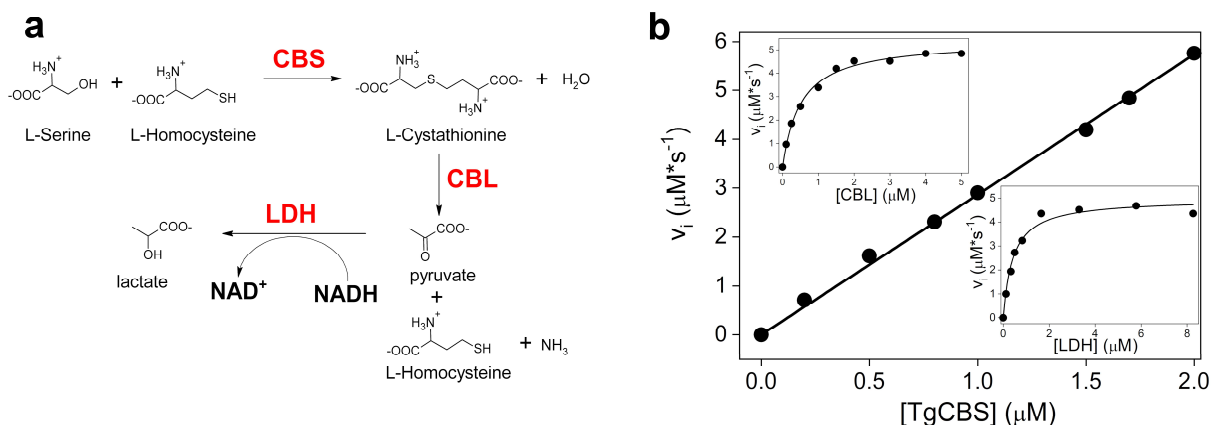

**Figure S1. Coupled-coupled CBS assay.** (a) Scheme of CBL/LDH coupled-coupled assay for CBS. CBS catalyzes condensation of L-Ser with L-Hcys to form L-Cth which is then converted to pyruvate, L-Hcys, and ammonia by CBL. Next, the conversion of pyruvate to lactate by LDH is accompanied by NADH oxidation, which is followed spectrophotometrically at 340 nm. (b) Dependence of the rate of NADH oxidation in the CBL/LDH assay as a function of TgCBS, CBL, and LDH concentration. Reactions were carried out in MBP pH 9 containing 0.2 mM NADH, 20  $\mu$ M PLP, 1 mM L-Ser, 0.8 mM L-Hcys, and: *main panel*, 0.2-2  $\mu$ M TgCBS, 1.5  $\mu$ M CBL and 2  $\mu$ M LDH; *upper inset*, 1.5  $\mu$ M TgCBS, 0.1-5  $\mu$ M CBL and 2  $\mu$ M LDH; *lower inset*, 1.5  $\mu$ M TgCBS, 1.5  $\mu$ M CBL and 0.1-8.2  $\mu$ M LDH.

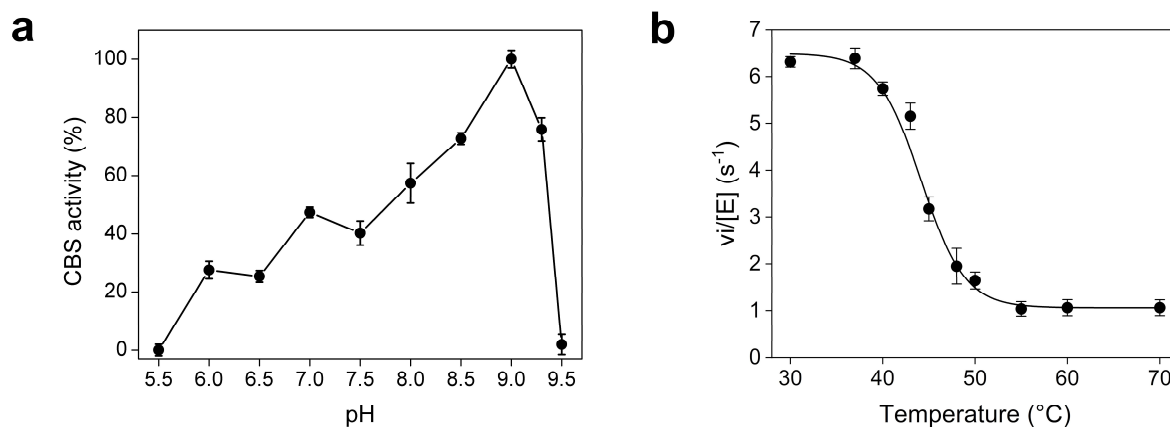

**Figure S2. Effect of pH and temperature on CBS canonical activity of TgCBS.** (a) pH-dependent activity profile for TgCBS performed at constant substrate concentrations (10 mM L-Ser and 0.8 mM L-Hcys) in the pH range of 5.5-9.5 at 37  $^{\circ}$ C. (b) Effect of thermal pre-treatment of TgCBS (10 min at temperatures between 30 $^{\circ}$ C and 70 $^{\circ}$ C) on its steady-state initial velocity at saturating concentration of L-Ser and L-Hcys in the canonical reaction. Each data set is relative to four replicas and error bars represent s.e.m.
